# Supplementary material for: The quantitative contribution of interfacial coexisting Mn and O vacancies to MnO2 photocatalytic degradation of phenol
Source: Royal Society of Chemistry journal article supplement (doi:10.1039/d3cy01005h), 2023-01-01
Supplement: d3cy01005h1.pdf [file d3cy01005h1.pdf]

## **The Quantitative Contribution of Interfacial Coexisting Mn, O Vacancies to MnO<sub>2</sub> Photocatalytic Degradation of Phenol**

Yahui Zhou <sup>a</sup>, Xingxin Lei <sup>a</sup>, Dali Yan <sup>a</sup>, Jian Ye <sup>a</sup>, Bo. Deng <sup>a, \*</sup>, Weilin.  
Xu <sup>a</sup>

<sup>a</sup> State Key Laboratory of New Textile Materials & Advanced Processing Technologies,  
Wuhan Textile University, Wuhan, Hubei 430200, China

\*Corresponding author: Bo Deng ([dengjianguo88@outlook.com](mailto:dengjianguo88@outlook.com));

## **The mechanism of $V_{Mn}$ formation**

During the formation of  $\delta$ - $MnO_2$ , because of the presence of excess interlayer  $K^+$ , in order to maintain charge balance, the reaction system is caused to form a mixed state with random distribution of  $Mn^{4+}O_6$  and  $Mn^{3+}O_6$ . (**CrystEngComm., 2019, 1793-1805.**) Under high-temperature reaction conditions,  $Mn^{3+}O_6$  is susceptible to deformation, and the severely deformed portion will be readily reconstructed with the increase of lattice strain, during which the Mn-O bond will be broken, thus detaching the  $Mn^{3+}$  and resulting in the formation of a  $V_{Mn}$  (**Journal of Energy Chemistry., 2021, 245-258**) Therefore,  $MnO_2$  was prepared using a hydrothermal reaction of 1 g of  $KMnO_4$  with 0.8 g and 1.8 g of ammonium oxalate, respectively, with ammonium oxalate acting as the reducing agent. Relative to 1.8 g ammonium oxalate, the 0.8 g ammonium oxalate system has a relatively higher content of  $K^+$  and tends to produce more  $V_{Mn}$ . (**Applied Catalysis B: Environmental., 2017, 147-155**)

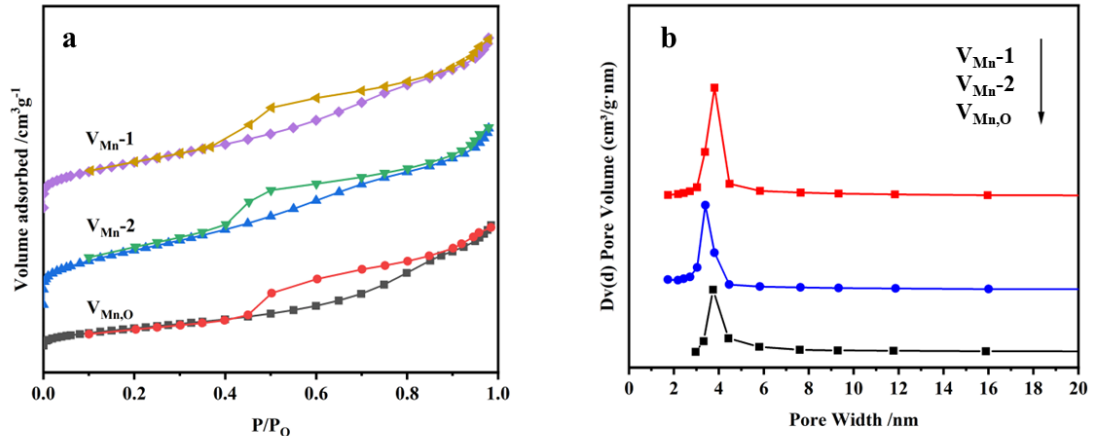

Fig S1. (a) Analysis of  $N_2$  adsorption and desorption of  $MnO_2$  samples; (b) Pore size distributions for  $V_{Mn-1}$ ,  $V_{Mn-2}$ ,  $V_{Mn,O}$ .

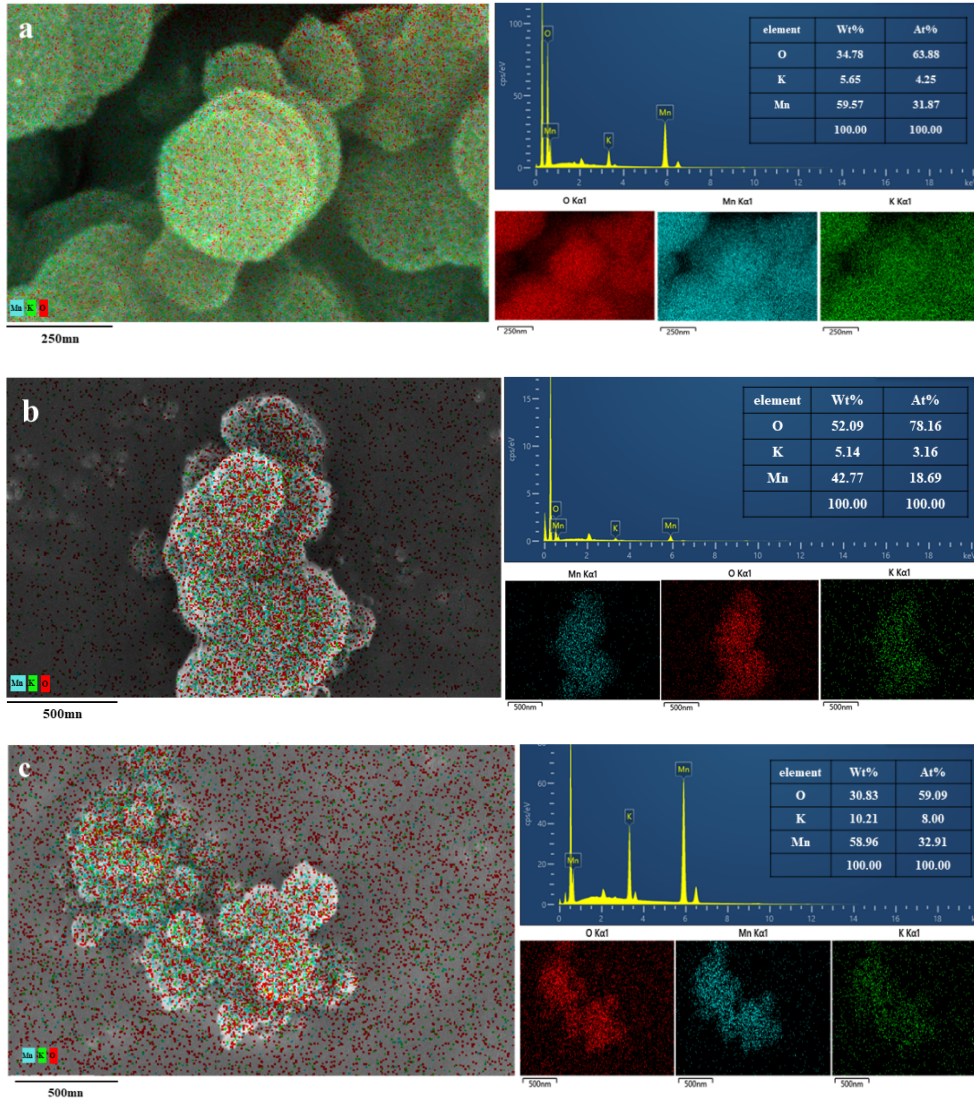

Fig S2. Energy dispersive spectra (EDS) of  $V_{Mn-1}$ ,  $V_{Mn-2}$ ,  $V_{Mn,O}$ .

## Calculation process

From the chemical formulae of the three samples, the molar mass ( $M$ ) of 50 mg of sample and the amount of substance ( $n$ ) of  $V_{Mn}$  and  $V_O$  were calculated for  $V_{Mn-1}$  ( $K_{0.09}Mn_{0.98} V_{Mn} 0.02O_2$ ),  $V_{Mn-2}$  ( $K_{0.11}Mn_{0.96} V_{Mn} 0.04O_2$ ),  $V_{Mn, O}$  ( $K_{0.11}Mn_{0.96} V_{Mn} 0.04 O_{1.97} V_O 0.03$ ). The  $V_{Mn}$  content of  $V_{Mn-1}$  and  $V_{Mn-2}$  was calculated to be  $1.12 \times 10^{-5}$  mol and  $2.24 \times 10^{-5}$  mol by using the equation:  $n = m/M$ .

The contribution (487321.43 (mg/L) phenol/mol) of each mole of  $V_{Mn}$  to the degradation of phenol was obtained by dividing the difference between the degradation rates of the two by the  $V_{Mn}$  content. The contribution (125917.16 (mg/L)<sub>phenol/mol</sub>  $V_O$ ) of single molar  $V_O$  to the degradation of phenol was calculated by the same method.

## Models and computational methods

We have employed the Vienna Ab initio Simulation Package (VASP) to perform all density functional theory (DFT) calculations. The elemental core and valence electrons were represented by the projector augmented wave (PAW) method and plane-wave basis functions with a cutoff energy of 490 eV. Generalized gradient approximation with the Perdew-Burke-Ernzerh of (GGA-PBE) exchange-correlation functional was employed in all the calculations. Geometry optimizations were performed with the force convergency smaller than 0.05 eV/Å. Spin-polarization effect was also considered. The DFT+U approach was introduced to treat the highly localized Mn 3d states, using parameters of  $U-J = 2.5$ eV. Monkhorst-Pack k-points of  $3 \times 3 \times 1$  was applied for all the calculations.

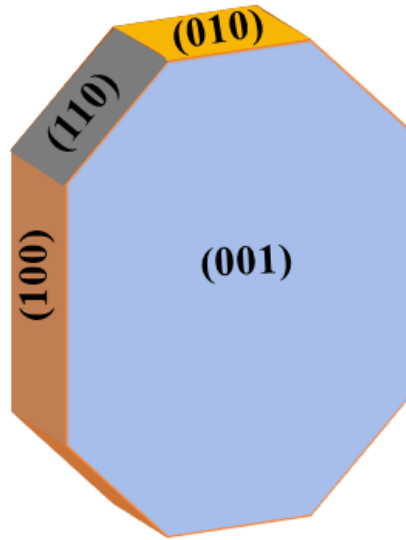

Fig.S3. Wulff construction of  $\delta\text{-MnO}_2$ .

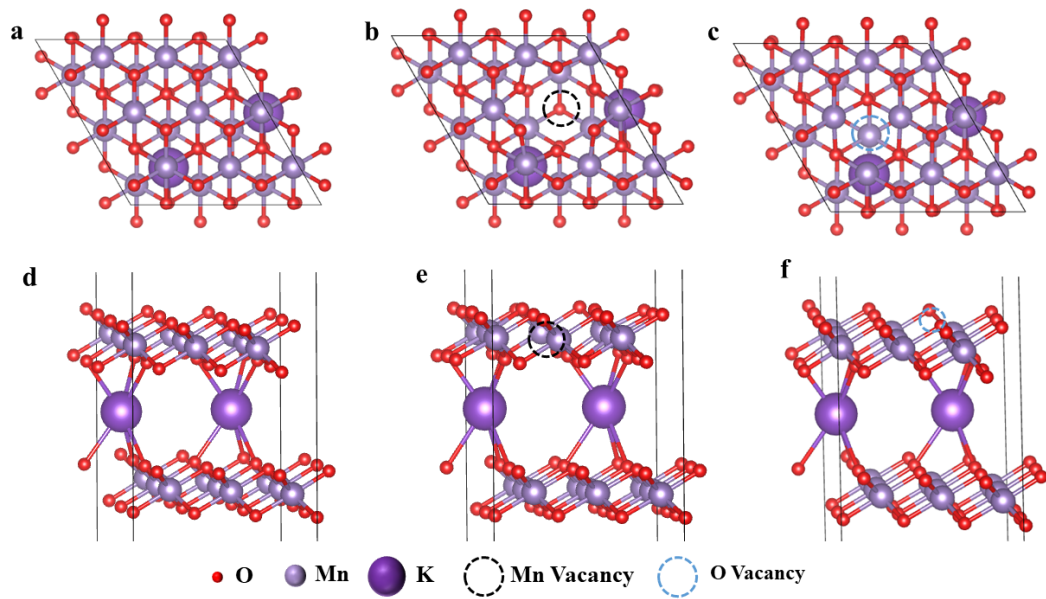

Fig S4. (a,d) perfect (001)  $\text{MnO}_2$ , (b,e) Mn vacancy (001)  $\text{MnO}_2$ , (c,f) (001) O vacancy (001)  $\text{MnO}_2$ .

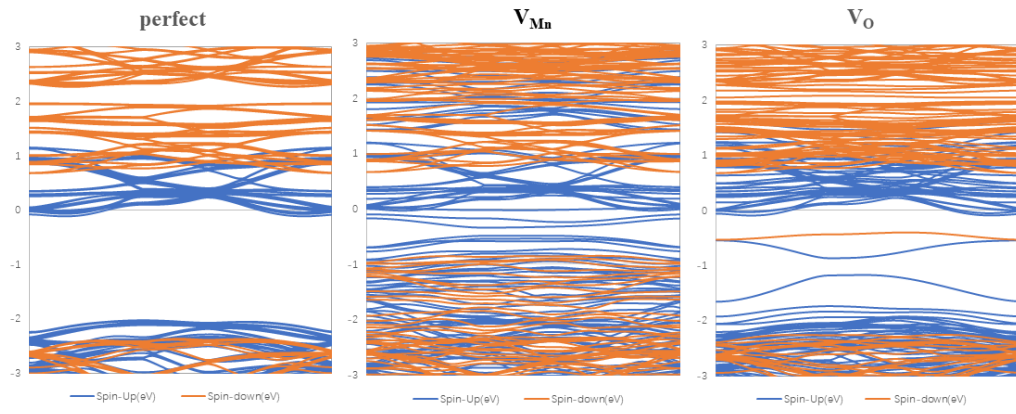

Fig S5. Band gap diagrams of perfect (001)  $MnO_2$ , Mn vacancy (001)  $MnO_2$ , (001) O vacancy (001)  $MnO_2$



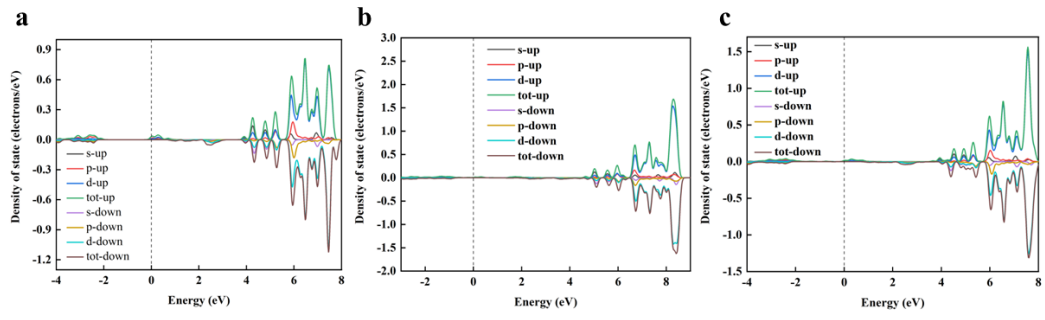

Fig S6. Density states of each orbital of element K in the three samples (a) perfect (001) MnO<sub>2</sub>, (b) Mn vacancy (001) MnO<sub>2</sub>, (c) (001) O vacancy (001) MnO<sub>2</sub>.

Table S1. A comparison table with similar studies.

| Sample                                                       | Dosage | Lighting conditions         | phenol concentration  | Time    | Volume of solution | degradation rate | Temperature |     |
|--------------------------------------------------------------|--------|-----------------------------|-----------------------|---------|--------------------|------------------|-------------|-----|
| $\delta$ -MnO <sub>2</sub>                                   | 100 mg | Visible light               | 1000 ppm              | 180 min | 20 mL              | 100 %            | 70 °C       | [1] |
| MnO <sub>2</sub>                                             | 50 mg  | 300 W ( $\lambda > 420$ nm) | 100 mg/L              | 30 min  | 50 mL              | 10 %             | 25±2 °C     | [2] |
| MnO <sub>2</sub> /g-C <sub>3</sub> N <sub>4</sub>            | 50 mg  | Visible light               | 5 mg L <sup>-1</sup>  | 100 min | 100 mL             | 100 %            | /           | [3] |
| Sn doped MnO <sub>2</sub>                                    | 25 mg  | Uv 365 nm                   | /                     | 100 min | /                  | 98.5 %           | /           | [4] |
| Ag doped MnO <sub>2</sub>                                    | 50 mg  | Visible light<br>300W xenon | 5 mg L <sup>-1</sup>  | 100 min | 100mL              | 90 %             | /           | [5] |
| g-C <sub>3</sub> N <sub>4</sub> / $\alpha$ -MnO <sub>2</sub> | 40 mg  | lamp ( $\lambda > 400$ nm)  | 10 mg L <sup>-1</sup> | 140 min | 80mL               | 98 %             | /           | [6] |
| MnO <sub>2</sub> @CQD                                        | 20 mg  | Visible light               | 10 ppm                | 50 min  | 50 mL              | 90 %             | /           | [7] |

## References:

- 1C. Ma, Y. Wen, C. Rong, N. Zhang, J. Zheng and B. H. Chen, *Catal Sci Technol*, 2017, **7**, 3200–3204.
- 2E. Saputra, S. Muhammad, H. Sun, H. M. Ang, M. O. Tadé and S. Wang, *Environ Sci Technol*, 2013, **47**, 5882–5887.
- 3S. Panimalar, R. Uthrakumar, E. T. Selvi, P. Gomathy, C. Inmozhi, K. Kaviyarasu and J. Kennedy, *Surf Interfaces*, 2020, **20**, 100512.
- 4S. Panimalar, M. Subash, M. Chandrasekar, R. Uthrakumar, C. Inmozhi, W. A. Al-Onazi, A. M. Al-Mohaimed, T.-W. Chen, J. Kennedy, M. Maaza and K. Kaviyarasu, *Chemosphere*, 2022, **293**, 133646.
- 5M. F. Warsi, K. Chaudhary, S. Zulfiqar, A. Rahman, I. A. Al Safari, H.

M. Zeeshan, P. O. Agboola, M. Shahid and M. Suleman, *Ceramics International*, 2022, **48**, 4930–4939.

6Y. Shi, M. Zhang, Y. Li, G. Liu, R. Jin, Q. Wang, H. Xu and S. Gao, *Ceram Int*, 2020, **46**, 25905–25914.

7A. Mehta, A. Mishra and S. Basu, *Environ. Sci.: Water Res. Technol.*, 2018, **4**, 2012–2020.

**Table S2.** The toxicity of the intermediates of phenol degradation

| Compound | Acute Toxicity (mg/L) |                |                    | Chronic Toxicity (mg/L) |         |             |
|----------|-----------------------|----------------|--------------------|-------------------------|---------|-------------|
|          | Fish (LC50)           | Daphnid (LC50) | Green Algae (EC50) | Fish                    | Daphnid | Green Algae |
| Phenol   | 27.7                  | 9.64           | 2.4                | 2.61                    | 0.969   | 4.53        |
| HQ       | 2.22                  | 256            | 4.9                | 14.2                    | 101     | 0.568       |
| CA       | 2.22                  | 256            | 4.9                | 14.2                    | 101     | 0.568       |
| RO       | 2.22                  | 256            | 4.9                | 14.2                    | 101     | 0.568       |
| BQ       | 0.095                 | 0.738          | 0.047              | 0.0091                  | 4.87    | 0.011       |
